# Supplementary material
Source: Springer Nature journal article supplement (https://www.springermedizin.de/resource/supplementary/12985_2007_331_MOESM6_ESM.pdf/9607538)

**A**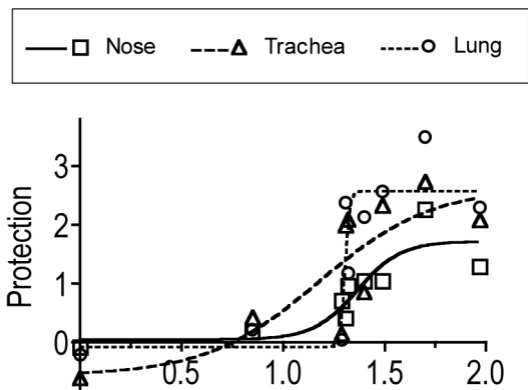**B**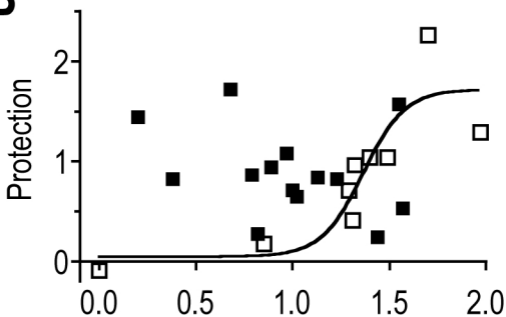**C**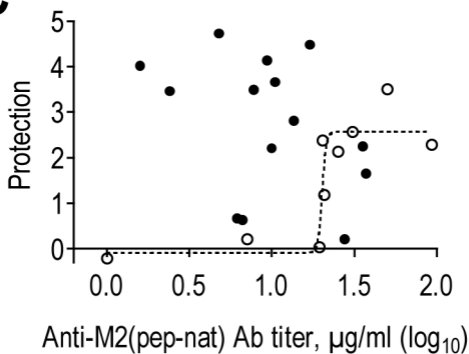

Supplement: MOESM6 [file 9607538]
